# Supplementary material
Source: publisher figshare collection journal article supplement (https://acs.figshare.com/ndownloader/files/4755838)
Supplement: Supplementary file 1 [file 4755838]

## Supporting Information

Roden *et al.*, Emission Factors and Real-time Optical Properties of Particles Emitted from Traditional Wood Burning Cookstoves, es052080i

### *Sampling Probe*

Sketch and drawing, including dimensions

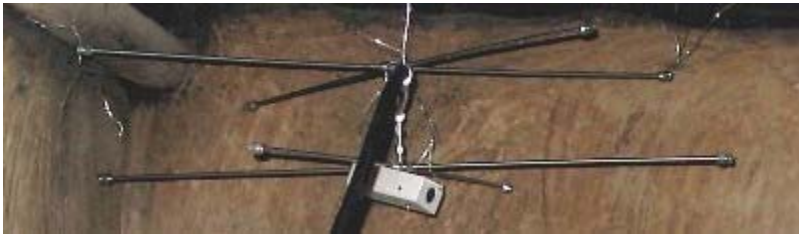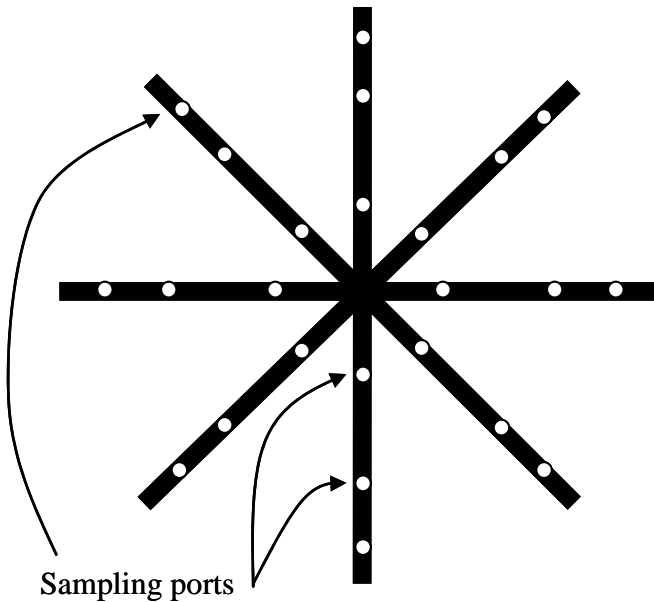

8 sampling arms each with a length of 50 cm (1m across).  
Each Sampling arm has three holes.  
Holes are located at 14.5, 33, and 43.5 cm out from the center.  
Each hole has a diameter of 0.35 cm.

## *Particle Losses*

### **Probe Efficiency:**

We estimated the probe efficiency using relationships given by Brockmann (1993) for aspiration efficiency and bend efficiency. We used estimated aspiration efficiency due to sampling at a 90 degree angle, which provides a conservative (high) estimate of loss. We also accounted for the two 90-degree bends. We then applied the mass size distribution measured by Kleeman *et al.* (1999) for pine combustion. Number particle size distributions measured in our laboratory for cookstoves are similar; they show number peaks at 80-200 nm, but these data are unpublished.

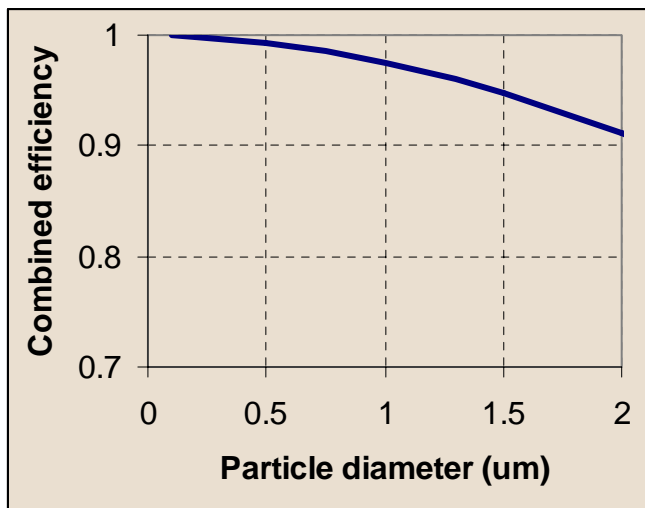

### References:

Brockmann, J.E. (1993) Sampling and Transport of Aerosols. In K. Willeke, and P.A. Baron, Eds. *Aerosol Measurement: Principles, Techniques and Applications*, p. 77-111. Van Nostrand Reinhold, New York.

Kleeman, M.J.; Schauer, J.J.; Cass, G.R. Size and composition distribution of fine particulate matter emitted from wood burning, meat charbroiling, and cigarettes. *Environ. Sci. Tech.* **1999**, 33, 3516-3523.

### **Conductive tubing and nephelometer**

We estimated the particle loss in the conductive tubing, and in the nephelometer, by generating representative aerosols, pulling them through our system, and measuring the concentration at different points. We generated wood smoke separately in both flaming and smoldering conditions and pulled it into a sealed vessel. The sealed vessel provides a steady source of representative size aerosol, without the fluctuations that a real fire provides. We continuously removed the smoke from the vessel and drew it through the sampling system. We measured particle concentrations with a TSI 3010 condensation

particle counter (CPC) at three locations: the input to our system (directly after the probe), a point after 3 meters of conductive tubing, and a point directly after the Radiance Research M903 Nephelometer. These sampling points are designated S1, S2, and S3 respectively. The system flow rate was set to mimic our field conditions. Every minute, we alternated between the sampling locations (S1, S2, and S3) and recorded the particle concentration.

The continuous flow out of the sealed vessel produced a declining aerosol concentration (filtered air is allowed to enter the vessel to maintain a constant pressure, close to ambient conditions). We used the measurements taken at S1 to estimate the decreasing particle concentration in the vessel as a function of time. The difference between this concentration and the concentration measured at the test points S2 and S3 gives the percentage of particles lost in only the conductive tubing, and in both the conductive tubing and nephelometer respectively.

We also examined the size distribution with a TSI 3071 electrostatic classifier (Model 3934 SMPS) at each test point, to verify that particle loss was not due to either only large or only small particles. If the largest particles were being lost, there could be a significant change in mass even if particle number did not change. There was no significant change in particle size distribution between the starting and ending test points (S1 and S3) when measured in direct succession.

| Losses                                | Total Observations | Flaming (% loss) | Smoldering (% loss) | Average (% loss) |
|---------------------------------------|--------------------|------------------|---------------------|------------------|
| Conductive tubing (S1 to S2) at 7 lpm | 7                  | $2.1 \pm 0.5$    | $1.28 \pm 0.8$      | $1.69 \pm 0.7$   |
| Nephelometer M903 (S2 to S3) at 4 lpm | 8                  | $1.32 \pm 1.0$   | $1.71 \pm 1.0$      | $1.51 \pm 0.9$   |

***Temperature Profile for EC/OC Analysis, Sunset Laboratory Carbon Analyzer:***

| Step duration (sec) | End temperature (C) | Atmosphere |
|---------------------|---------------------|------------|
| 10                  | -                   | He         |
| 70                  | 310                 | He         |
| 60                  | 475                 | He         |
| 60                  | 615                 | He         |
| 90                  | 870                 | He         |
| 35                  | cool down           | He         |
| 45                  | 550                 | He+Ox      |
| 45                  | 625                 | He+Ox      |
| 45                  | 700                 | He+Ox      |
| 45                  | 775                 | He+Ox      |
| 45                  | 850                 | He+Ox      |
| 120                 | 890                 | He+Ox      |
| Calibration         |                     |            |

### ***Uncertainty Calculations:***

| Corrections and Uncertainty Calculations       | Average value used | Single Sigma Stdev | Method used to determine               |
|------------------------------------------------|--------------------|--------------------|----------------------------------------|
| CO2 repeatability (ppm)                        |                    | 18                 | Measured in lab                        |
| CO2 span correction                            | 0.95               | 0.06               | Measured in lab                        |
| CO2 pressure correction : ambient (mbar)       | amb                | 10                 | Ambient Measurement                    |
| CO2 pressure correction : system drop(mbar)    | -11                | 5                  | Measured in lab                        |
| CO2 and CO temperature correction (deg K)      | amb                | 3                  | Ambient Measurement                    |
| CO repeatability (ppm)                         |                    | 11                 | Measured in lab                        |
| CO span correction                             | 1                  | 0.01               | Measured in lab                        |
| Methane, NMHC & particles (ch4+nm+part)/C      | 2.4                | 1.8                | references noted in text               |
| Wood %C                                        | 50%                | 2%                 | references noted in text               |
| Percent CO2 from respiration (%)               | 2.2                | 1.7                | Est. based on fuel usage & resp. rates |
| Flow variation due to filter pressure drop (%) | 0                  | 1                  | Measured in lab                        |
| Particle loss entering probe (%)               | 1.0%               | 1%                 | Calculated                             |
| Particle loss in conductive tubing (%)         | 1.7%               | 0.7%               | Measured in lab CPC & DMA              |
| Particle loss through nephelometer (%)         | 1.5%               | 0.9%               | Measured in lab CPC & DMA              |
| Background PM                                  | test depnt         |                    | Optical background/sample ratio        |
| CO % for tests missing CO data (as % CO2)      | 10.1%              | 5.5%               | Estimated from test with CO data       |
| Truncation error of Neph                       | 4%                 | 1%                 | Ref for TSI Neph                       |
| Neph uncertainty                               |                    | 10%                |                                        |
| PSAP - Bond PSAP correction Equation           |                    |                    | reference noted in text                |

### ***Change in RH Calculations, based on maximum CO<sub>2</sub> Concentrations.***

The total change in RH is estimated by including water from fuel moisture, water from fuel hydrogen, and steam from the cooking pot. Water boiling rates are high estimates from Aprovecho Research (personal communication).

| Test | Dry wood carbon content | Moisture content | Water from wood moisture/ carbon | Dry Wood Hydrogen content | Water from wood hydroger/ carbon | Wood burn rate (kg/hr) | Water release rate (g/min) | Water boiled/ carbon burned | Max delta CO2 conc | H2O conc | Psat at 80deg F | Patm (kPa) | fractional change in RH | Total change in RH |
|------|-------------------------|------------------|----------------------------------|---------------------------|----------------------------------|------------------------|----------------------------|-----------------------------|--------------------|----------|-----------------|------------|-------------------------|--------------------|
|      | (g_C / g_wood)          | (g_H2O / g_wood) | mole_H2O /mole_C                 | (g_H/ g_wood)             | mole_H2O /mole_C                 | (kg/hr)                | (g/min)                    | mole_h2o /mole_C            | (ppm)              | (ppm)    | (kPa)           | (kPa)      |                         | (%)                |
| 1    | 50%                     | 15.6%            | 0.2077                           | 6%                        | 0.72                             | 1.5                    | 15                         | 0.8                         | 412                | 713      | 3.1             | 88.7       | 0.0204                  | 2.0%               |
| 2    | 50%                     | 15.3%            | 0.2042                           | 6%                        | 0.72                             | 1.5                    | 15                         | 0.8                         | 769                | 1325     | 3.1             | 88.7       | 0.0379                  | 3.8%               |
| 3    | 50%                     | 15.4%            | 0.2052                           | 6%                        | 0.72                             | 1.5                    | 15                         | 0.8                         | 1075               | 1855     | 3.1             | 89.1       | 0.0533                  | 5.3%               |
| 4    | 50%                     | 14.6%            | 0.1952                           | 6%                        | 0.72                             | 1.5                    | 15                         | 0.8                         | 520                | 893      | 3.1             | 88.9       | 0.0256                  | 2.6%               |
| 5    | 50%                     | 14.4%            | 0.1920                           | 6%                        | 0.72                             | 1.5                    | 15                         | 0.8                         | 1071               | 1834     | 3.1             | 88.5       | 0.0523                  | 5.2%               |
| 6    | 50%                     | 13.1%            | 0.1744                           | 6%                        | 0.72                             | 1.5                    | 15                         | 0.8                         | 879                | 1490     | 3.1             | 88.5       | 0.0425                  | 4.3%               |
| 7    | 50%                     | 16.0%            | 0.2127                           | 6%                        | 0.72                             | 1.5                    | 0                          | 0                           | 1099               | 1025     | 3.1             | 88.6       | 0.0293                  | 2.9%               |
| 8    | 50%                     | 23.8%            | 0.3179                           | 6%                        | 0.72                             | 1.5                    | 15                         | 0.8                         | 893                | 1641     | 3.1             | 88.8       | 0.0470                  | 4.7%               |
| 9    | 50%                     | 10.4%            | 0.1389                           | 6%                        | 0.72                             | 1.5                    | 15                         | 0.8                         | 705                | 1169     | 3.1             | 88.9       | 0.0335                  | 3.4%               |
| 10   | 50%                     | 10.4%            | 0.1389                           | 6%                        | 0.72                             | 1.5                    | 15                         | 0.8                         | 146                | 242      | 3.1             | 88.9       | 0.0069                  | 0.7%               |
| 11   | 50%                     | 18.3%            | 0.2434                           | 6%                        | 0.72                             | 1.5                    | 15                         | 0.8                         | 577                | 1017     | 3.1             | 89.3       | 0.0293                  | 2.9%               |
| 12   | 50%                     | 26.3%            | 0.3509                           | 6%                        | 0.72                             | 1.5                    | 15                         | 0.8                         | 488                | 913      | 3.1             | 89.0       | 0.0262                  | 2.6%               |
| 13   | 50%                     | 11.3%            | 0.1504                           | 6%                        | 0.72                             | 1.5                    | 15                         | 0.8                         | 316                | 527      | 3.1             | 88.8       | 0.0151                  | 1.5%               |
| 14   | 50%                     | 30.1%            | 0.4007                           | 6%                        | 0.72                             | 1.5                    | 15                         | 0.8                         | 305                | 586      | 3.1             | 89.2       | 0.0168                  | 1.7%               |
| 15   | 50%                     | 22.2%            | 0.2960                           | 6%                        | 0.72                             | 1.5                    | 0                          | 0                           | 146                | 148      | 3.1             | 88.1       | 0.0042                  | 0.4%               |

### *Pictures of stoves*

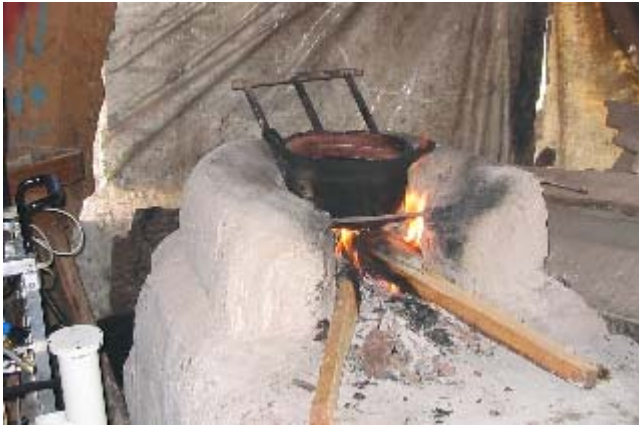

Traditional stove from test 5

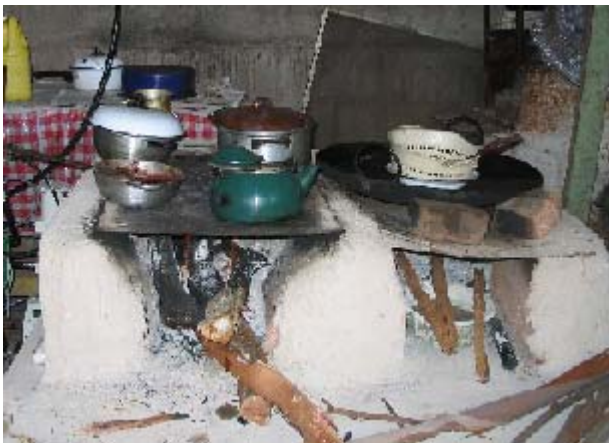

Traditional stove from test 4

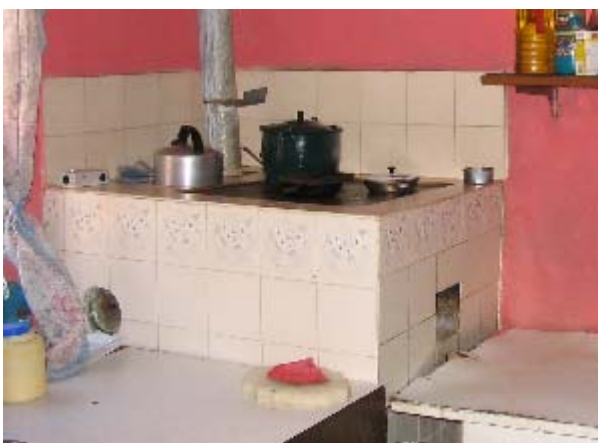

Improved stove from test 7
